# Supplementary material
Source: Research Square preprint supplement (doi:10.21203/rs.3.rs-8919968/v1)
Supplement: Supplementary file 2 [file 4bce607a71420f2ce8c39204.pdf]

**Table 1. Demographic and clinical information of sample donors**

| <b>Tissue</b>                                     | <b>Gut</b><br>(n = 3) | <b>Gut</b><br>(n = 8) | <b>Lymph node (LN)</b><br>(n = 8) | <b>Tonsil</b><br>(n = 7) | <b>Blood and LN</b><br>(n =5)       | <b>Blood and LN</b><br>(n = 15)    |
|---------------------------------------------------|-----------------------|-----------------------|-----------------------------------|--------------------------|-------------------------------------|------------------------------------|
| <b>HIV status</b>                                 | Negative              | Positive              | Negative                          | Negative                 | Positive                            | Positive                           |
| <b>Sex</b><br>(Male/Female)                       | 2/1                   | 7/1                   | 8/0                               | 7/0                      | 5/0                                 | 15/0                               |
| <b>Age (years)</b><br>mean (min - max)            | 53<br>(43- 60)        | 52.62<br>(47 - 62)    | 33.25<br>(22-44)                  | 32.8<br>(26 - 38)        | 29.6<br>(22 - 53)                   | 27.8<br>(22 - 37)                  |
| <b>HIV Classification</b>                         | Negative              | HIV+ ART              | Negative                          | Negative                 | Acute<br>Fiebig IV - V              | Chronic untreated                  |
| <b>Months on ART</b>                              | NA                    | 109.7<br>(17 - 174)   | NA                                | NA                       | 0                                   | 0                                  |
| <b>CD4 T cells (cells/uL)</b><br>mean (min - max) | 589.33<br>(451 - 717) | 502.75<br>(255-764)   | 944.25<br>(699 -1264)             | 1170.6<br>(917 - 1291)   | 493.4<br>(327 - 696)                | 455.2<br>(144 - 777)               |
| <b>% of CD4</b><br>mean (min - max)               | 46.66<br>(38 - 53)    | 28.25<br>(19-44)      | 38.375<br>(32 - 46)               | 40<br>(37 - 40)          | 18.4<br>(12 - 26)                   | 17.33<br>(9 - 29)                  |
| <b>CD8 T cells (cells/uL)</b><br>mean (min - max) | 261.33<br>(200 - 339) | 653.25<br>(368-1024)  | 760.62<br>(489 - 1067)            | 679.6<br>(526 - 856)     | 1356.2<br>(854 - 2171)              | 1509.73<br>(465 - 3,623)           |
| <b>% of CD8</b><br>mean (min - max)               | 20.66<br>(17 - 25)    | 36.62<br>(24-49)      | 31.25<br>(20 - 39)                | 24.4<br>(20 - 35)        | 47.6<br>(35 - 65)                   | 54.8<br>(22 - 79)                  |
| <b>CD4:CD8</b><br>mean (min - max)                | 2.31<br>(1.84 - 2.99) | 0.81<br>(0.53-1.5)    | 1.28<br>(0.98- 2.02)              | 1.81<br>(1.07 - 2.31)    | 0.42<br>(0.19 - 1.76)               | 0.38<br>(0.12 - 1.02)              |
| <b>pVL (copies/ml)</b><br>mean (min - max)        | NA                    | Undetectable          | NA                                | NA                       | 4,181,527.6<br>(46,355 - 9,999,999) | 815,407.85<br>(30,887 - 6,907,692) |
| <b>Log pVL</b><br>mean (min - max)                | NA                    | 0                     | NA                                | NA                       | 6.05<br>(4.67 - 7)                  | 5.39<br>(4.49 - 6.84)              |
