# Supplementary material
Source: Research Square preprint supplement (doi:10.21203/rs.3.rs-8919968/v1)

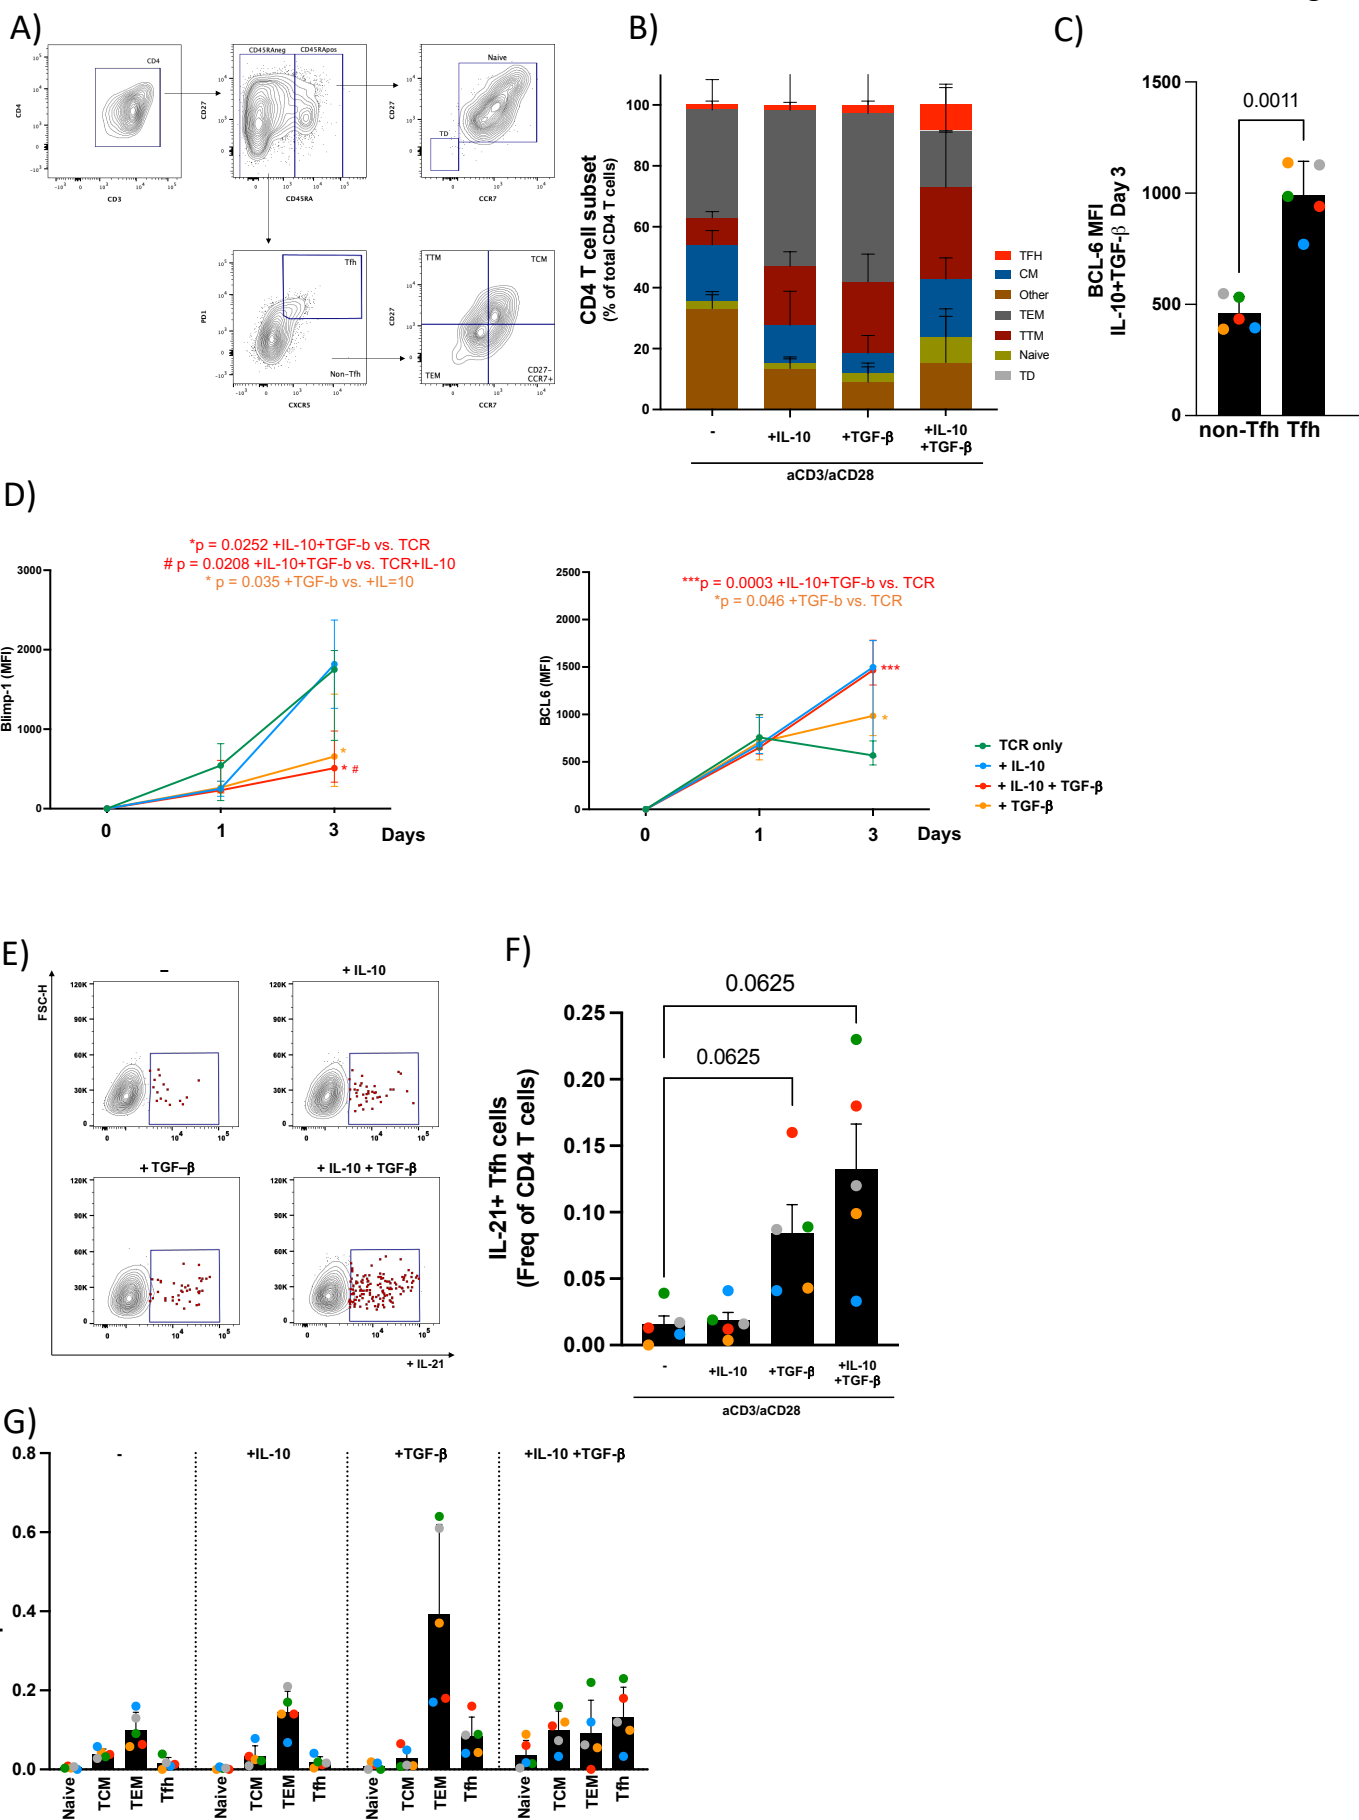

Supplement: Supplementary file 1 [file 2c3a79c94f8e69a659e60732.pdf]

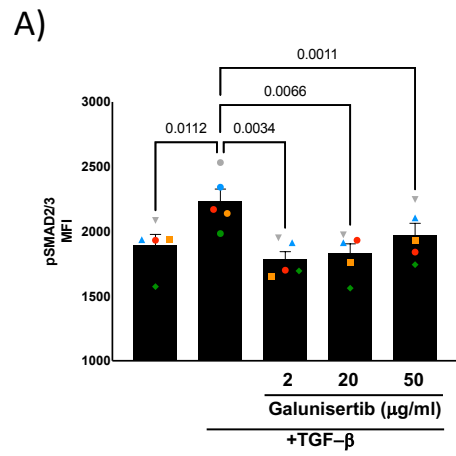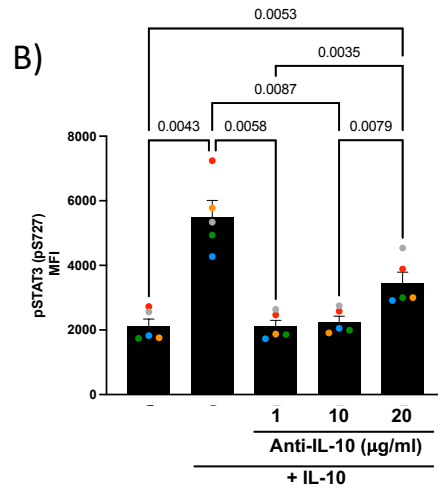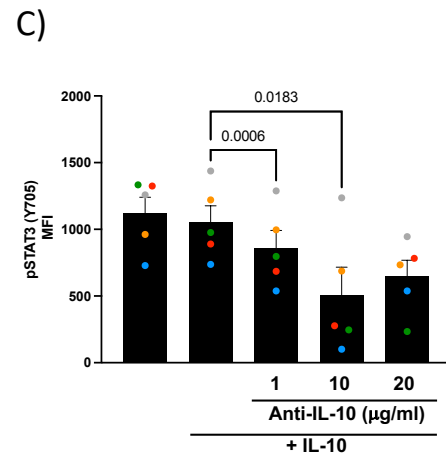

Supplement: Supplementary file 3 [file 64a0445a507c1e6f4c4157e3.pdf]
